# Supplementary material
Source: HighWire-hosted journal article supplement (https://bibliotheek.ehb.be/content/56/3/131)
Supplement: inline-supplementary-material-6 [file inline-supplementary-material-6.pdf]

| Sex    | ICD10 | Death_cause                           | CNV1              | CNV2              |
|--------|-------|---------------------------------------|-------------------|-------------------|
| FEMALE | C509  | Cancer of the Breast                  | 10q11.21q11.23del |                   |
| MALE   | I269  | Pulmonary embolism                    | 10q11.21q11.23del |                   |
| FEMALE | A810  | Creutzfeldt-Jakob disease             | 10q11.21q11.23dup |                   |
| MALE   | I219  | Myocardial Infarction                 | 10q11.21q11.23dup |                   |
| MALE   | R99   | Unspecified                           | 10q11.21q11.23dup |                   |
| FEMALE | C221  | Cancer of the Liver                   | 13q12.12del       |                   |
| MALE   | C349  | Cancer of the lung                    | 13q12.12del       | 15q11.2dup        |
| FEMALE | C541  | Cancer of the Endometrium             | 13q12.12del       | 15q13.3dup_CHRNA7 |
| MALE   | C61   | Cancer of the Prostate                | 13q12.12del       |                   |
| MALE   | C911  | Chronic lymphocytic leukaemia         | 13q12.12del       |                   |
| MALE   | E785  | Hyperlipidaemia                       | 13q12.12del       |                   |
| MALE   | W190  | Unspecified fall                      | 13q12.12del       |                   |
| FEMALE | C189  | Cancer of the Colon                   | 13q12.12dup       |                   |
| MALE   | C259  | Cancer of the Pancreas                | 13q12.12dup       |                   |
| FEMALE | C259  | Cancer of the Pancreas                | 13q12.12dup       |                   |
| MALE   | C349  | Cancer of the lung                    | 13q12.12dup       |                   |
| MALE   | C349  | Cancer of the lung                    | 13q12.12dup       |                   |
| MALE   | C349  | Cancer of the lung                    | 13q12.12dup       |                   |
| FEMALE | C56   | Cancer of the Ovary                   | 13q12.12dup       |                   |
| MALE   | C64   | Cancer of the Kidney                  | 13q12.12dup       | 17p12dup_CMT1A    |
| FEMALE | C719  | Cancer of the Brain                   | 13q12.12dup       |                   |
| MALE   | J841  | Other interstitial pulmonary diseases | 13q12.12dup       |                   |
| MALE   | X700  | Suicide                               | 13q12.12dup       |                   |
| FEMALE | C509  | Cancer of the Breast                  | 13q12dup_CRYL1    |                   |
| MALE   | B182  | Chronic viral hepatitis               | 15q11.2del        |                   |
| MALE   | C159  | Cancer of the Oesophagus              | 15q11.2del        |                   |
| MALE   | C159  | Cancer of the Oesophagus              | 15q11.2del        |                   |
| MALE   | C159  | Cancer of the Oesophagus              | 15q11.2del        |                   |
| FEMALE | C170  | Cancer of the Small Intestine         | 15q11.2del        |                   |
| MALE   | C187  | Cancer of the Colon                   | 15q11.2del        |                   |
| MALE   | C189  | Cancer of the Colon                   | 15q11.2del        |                   |
| FEMALE | C221  | Cancer of the Liver                   | 15q11.2del        |                   |
| MALE   | C240  | Cancer of the Biliary Tract           | 15q11.2del        |                   |
| MALE   | C259  | Cancer of the Pancreas                | 15q11.2del        |                   |
| FEMALE | C260  | Cancer of other digestive organs      | 15q11.2del        |                   |
| MALE   | C349  | Cancer of the lung                    | 15q11.2del        |                   |
| FEMALE | C349  | Cancer of the lung                    | 15q11.2del        |                   |
| MALE   | C349  | Cancer of the lung                    | 15q11.2del        |                   |
| MALE   | C349  | Cancer of the lung                    | 15q11.2del        |                   |
| FEMALE | C439  | Cancer of the skin                    | 15q11.2del        | 15q13.3dup_CHRNA7 |
| MALE   | C449  | Cancer of the skin                    | 15q11.2del        |                   |
| FEMALE | C509  | Cancer of the Breast                  | 15q11.2del        |                   |
| FEMALE | C509  | Cancer of the Breast                  | 15q11.2del        |                   |
| FEMALE | C509  | Cancer of the Breast                  | 15q11.2del        |                   |
| FEMALE | C509  | Cancer of the Breast                  | 15q11.2del        |                   |
| FEMALE | C509  | Cancer of the Breast                  | 15q11.2del        |                   |
| FEMALE | C509  | Cancer of the Breast                  | 15q11.2del        |                   |
| FEMALE | C541  | Cancer of the Endometrium             | 15q11.2del        |                   |
| MALE   | C61   | Cancer of the Prostate                | 15q11.2del        |                   |
| MALE   | C61   | Cancer of the Prostate                | 15q11.2del        |                   |
| MALE   | C64   | Cancer of the Kidney                  | 15q11.2del        |                   |
| MALE   | C64   | Cancer of the Kidney                  | 15q11.2del        |                   |
| FEMALE | C679  | Cancer of the Bladder                 | 15q11.2del        |                   |
| MALE   | C719  | Cancer of the Brain                   | 15q11.2del        |                   |
| MALE   | C719  | Cancer of the Brain                   | 15q11.2del        |                   |
| FEMALE | C80   | Cancer, site not known                | 15q11.2del        |                   |
| FEMALE | C800  | Cancer, site not known                | 15q11.2del        |                   |
| MALE   | C920  | Acute myeloid leukaemia               | 15q11.2del        |                   |
| MALE   | C920  | Acute myeloid leukaemia               | 15q11.2del        |                   |
| MALE   | D430  | Cancer of the Brain                   | 15q11.2del        |                   |
| MALE   | E115  | Diabetes                              | 15q11.2del        |                   |
| FEMALE | E149  | Diabetes                              | 15q11.2del        |                   |
| MALE   | F03   | Dementia                              | 15q11.2del        |                   |
| FEMALE | G309  | Alzheimer's disease                   | 15q11.2del        |                   |
| MALE   | G35   | Multiple sclerosis                    | 15q11.2del        |                   |
| MALE   | I219  | Myocardial Infarction                 | 15q11.2del        | 15q13.3dup_CHRNA7 |
| MALE   | I249  | Ischaemic heart disease               | 15q11.2del        |                   |
| MALE   | I259  | Ischaemic heart disease               | 15q11.2del        |                   |
| FEMALE | I38   | Endocarditis                          | 15q11.2del        |                   |
| MALE   | I517  | Cardiomegaly                          | 15q11.2del        |                   |
| MALE   | I517  | Cardiomegaly                          | 15q11.2del        |                   |
| MALE   | I713  | Aortic aneurysm                       | 15q11.2del        |                   |
| FEMALE | J13   | Pneumonia                             | 15q11.2del        |                   |
| MALE   | J181  | Pneumonia                             | 15q11.2del        | 15q13.3dup_CHRNA7 |
| FEMALE | K297  | Gastritis                             | 15q11.2del        |                   |

|        |      |                                       |                     |              |
|--------|------|---------------------------------------|---------------------|--------------|
| MALE   | R99  | Unspecified                           | 15q11.2del          |              |
| MALE   | C159 | Cancer of the Oesophagus              | 15q11.2dup          | 16p13.11.dup |
| MALE   | C159 | Cancer of the Oesophagus              | 15q11.2dup          |              |
| MALE   | C159 | Cancer of the Oesophagus              | 15q11.2dup          |              |
| FEMALE | C169 | Cancer of the Stomach                 | 15q11.2dup          |              |
| MALE   | C189 | Cancer of the Colon                   | 15q11.2dup          |              |
| MALE   | C189 | Cancer of the Colon                   | 15q11.2dup          |              |
| FEMALE | C221 | Cancer of the Liver                   | 15q11.2dup          |              |
| FEMALE | C258 | Cancer of the Pancreas                | 15q11.2dup          |              |
| MALE   | C259 | Cancer of the Pancreas                | 15q11.2dup          |              |
| MALE   | C259 | Cancer of the Pancreas                | 15q11.2dup          |              |
| MALE   | C259 | Cancer of the Pancreas                | 15q11.2dup          |              |
| MALE   | C349 | Cancer of the lung                    | 15q11.2dup          |              |
| MALE   | C349 | Cancer of the lung                    | 15q11.2dup          |              |
| FEMALE | C349 | Cancer of the lung                    | 15q11.2dup          |              |
| MALE   | C349 | Cancer of the lung                    | 15q11.2dup          |              |
| FEMALE | C349 | Cancer of the lung                    | 15q11.2dup          |              |
| MALE   | C439 | Cancer of the skin                    | 15q11.2dup          |              |
| FEMALE | C509 | Cancer of the Breast                  | 15q11.2dup          |              |
| FEMALE | C509 | Cancer of the Breast                  | 15q11.2dup          |              |
| FEMALE | C509 | Cancer of the Breast                  | 15q11.2dup          |              |
| FEMALE | C509 | Cancer of the Breast                  | 15q11.2dup          |              |
| FEMALE | C541 | Cancer of the Endometrium             | 15q11.2dup          |              |
| FEMALE | C56  | Cancer of the Ovary                   | 15q11.2dup          |              |
| FEMALE | C56  | Cancer of the Ovary                   | 15q11.2dup          |              |
| MALE   | C61  | Cancer of the Prostate                | 15q11.2dup          |              |
| MALE   | C61  | Cancer of the Prostate                | 15q11.2dup          |              |
| MALE   | C64  | Cancer of the Kidney                  | 15q11.2dup          |              |
| MALE   | C800 | Cancer, site not known                | 15q11.2dup          |              |
| FEMALE | C819 | Hodgkin's disease                     | 15q11.2dup          |              |
| FEMALE | C830 | non-Hodgkin's lymphoma                | 15q11.2dup          |              |
| MALE   | C859 | Non-Hodgkin's lymphoma                | 15q11.2dup          |              |
| MALE   | C97  | Cancer                                | 15q11.2dup          |              |
| MALE   | D619 | Aplastic anaemia                      | 15q11.2dup          |              |
| FEMALE | D860 | Sarcoidosis                           | 15q11.2dup          |              |
| MALE   | G122 | Motor neuron disease                  | 15q11.2dup          |              |
| MALE   | G20  | Parkinson's disease                   | 15q11.2dup          |              |
| MALE   | I219 | Myocardial Infarction                 | 15q11.2dup          |              |
| MALE   | I219 | Myocardial Infarction                 | 15q11.2dup          |              |
| MALE   | I251 | Ischaemic heart disease               | 15q11.2dup          |              |
| MALE   | I251 | Ischaemic heart disease               | 15q11.2dup          |              |
| MALE   | I259 | Ischaemic heart disease               | 15q11.2dup          |              |
| MALE   | I259 | Ischaemic heart disease               | 15q11.2dup          |              |
| MALE   | I64  | Stroke                                | 15q11.2dup          |              |
| MALE   | I713 | Aortic aneurysm                       | 15q11.2dup          |              |
| MALE   | J189 | Pneumonia                             | 15q11.2dup          |              |
| MALE   | J440 | COPD                                  | 15q11.2dup          |              |
| MALE   | J449 | COPD                                  | 15q11.2dup          |              |
| MALE   | J449 | COPD                                  | 15q11.2dup          |              |
| MALE   | J47  | Bronchiectasis                        | 15q11.2dup          |              |
| FEMALE | J841 | Other interstitial pulmonary diseases | 15q11.2dup          |              |
| MALE   | J841 | Other interstitial pulmonary diseases | 15q11.2dup          |              |
| FEMALE | K550 | Vascular disorders of intestine       | 15q11.2dup          |              |
| MALE   | K650 | Peritonitis                           | 15q11.2dup          |              |
| MALE   | K700 | Alcoholic liver disease               | 15q11.2dup          |              |
| MALE   | K709 | Alcoholic liver disease               | 15q11.2dup          |              |
| MALE   | K746 | Cirrhosis of liver                    | 15q11.2dup          |              |
| FEMALE | K746 | Cirrhosis of liver                    | 15q11.2dup          |              |
| FEMALE | X450 | Alcohol poisoning, accidental         | 15q11.2dup          |              |
| MALE   | X700 | Suicide                               | 15q11q13dup_BP3_BP5 |              |
| FEMALE | I609 | Intracerebral haemorrhage             | 15q13.3del          |              |
| FEMALE | J47  | Bronchiectasis                        | 15q13.3del          |              |
| MALE   | R99  | Unspecified                           | 15q13.3del          |              |
| MALE   | C159 | Cancer of the Oesophagus              | 15q13.3dup          |              |
| MALE   | C159 | Cancer of the Oesophagus              | 15q13.3dup          |              |
| FEMALE | C170 | Cancer of the Small Intestine         | 15q13.3dup          |              |
| FEMALE | C189 | Cancer of the Colon                   | 15q13.3dup          |              |
| FEMALE | C19  | Cancer of the rectosigmoid junction   | 15q13.3dup          |              |
| FEMALE | C221 | Cancer of the Liver                   | 15q13.3dup          |              |
| MALE   | C259 | Cancer of the Pancreas                | 15q13.3dup          |              |
| FEMALE | C259 | Cancer of the Pancreas                | 15q13.3dup          |              |
| MALE   | C349 | Cancer of the lung                    | 15q13.3dup          |              |
| MALE   | C800 | Cancer, site not known                | 15q13.3dup          |              |
| MALE   | I110 | Hypertensive heart disease            | 15q13.3dup          |              |
| MALE   | I219 | Myocardial Infarction                 | 15q13.3dup          |              |

|        |      |                                       |                   |  |
|--------|------|---------------------------------------|-------------------|--|
| FEMALE | I251 | Ischaemic heart disease               | 15q13.3dup        |  |
| MALE   | I259 | Ischaemic heart disease               | 15q13.3dup        |  |
| MALE   | I500 | Heart failure                         | 15q13.3dup        |  |
| FEMALE | I619 | Intracerebral haemorrhage             | 15q13.3dup        |  |
| MALE   | X780 | Suicide                               | 15q13.3dup        |  |
| MALE   | B24  | HIV                                   | 15q13.3dup_CHRNA7 |  |
| FEMALE | C159 | Cancer of the Oesophagus              | 15q13.3dup_CHRNA7 |  |
| MALE   | C159 | Cancer of the Oesophagus              | 15q13.3dup_CHRNA7 |  |
| FEMALE | C180 | Cancer of the Colon                   | 15q13.3dup_CHRNA7 |  |
| FEMALE | C189 | Cancer of the Colon                   | 15q13.3dup_CHRNA7 |  |
| FEMALE | C19  | Cancer of the rectosigmoid junction   | 15q13.3dup_CHRNA7 |  |
| MALE   | C20  | Cancer of the Rectum                  | 15q13.3dup_CHRNA7 |  |
| MALE   | C221 | Cancer of the Liver                   | 15q13.3dup_CHRNA7 |  |
| FEMALE | C259 | Cancer of the Pancreas                | 15q13.3dup_CHRNA7 |  |
| MALE   | C259 | Cancer of the Pancreas                | 15q13.3dup_CHRNA7 |  |
| FEMALE | C259 | Cancer of the Pancreas                | 15q13.3dup_CHRNA7 |  |
| FEMALE | C259 | Cancer of the Pancreas                | 15q13.3dup_CHRNA7 |  |
| MALE   | C259 | Cancer of the Pancreas                | 15q13.3dup_CHRNA7 |  |
| MALE   | C259 | Cancer of the Pancreas                | 15q13.3dup_CHRNA7 |  |
| MALE   | C349 | Cancer of the lung                    | 15q13.3dup_CHRNA7 |  |
| MALE   | C349 | Cancer of the lung                    | 15q13.3dup_CHRNA7 |  |
| FEMALE | C349 | Cancer of the lung                    | 15q13.3dup_CHRNA7 |  |
| FEMALE | C349 | Cancer of the lung                    | 15q13.3dup_CHRNA7 |  |
| MALE   | C349 | Cancer of the lung                    | 15q13.3dup_CHRNA7 |  |
| MALE   | C439 | Cancer of the skin                    | 15q13.3dup_CHRNA7 |  |
| MALE   | C459 | Mesothelioma                          | 15q13.3dup_CHRNA7 |  |
| FEMALE | C509 | Cancer of the Breast                  | 15q13.3dup_CHRNA7 |  |
| FEMALE | C509 | Cancer of the Breast                  | 15q13.3dup_CHRNA7 |  |
| FEMALE | C509 | Cancer of the Breast                  | 15q13.3dup_CHRNA7 |  |
| FEMALE | C541 | Cancer of the Endometrium             | 15q13.3dup_CHRNA7 |  |
| FEMALE | C56  | Cancer of the Ovary                   | 15q13.3dup_CHRNA7 |  |
| FEMALE | C56  | Cancer of the Ovary                   | 15q13.3dup_CHRNA7 |  |
| FEMALE | C579 | Cancer of the female genitals         | 15q13.3dup_CHRNA7 |  |
| MALE   | C61  | Cancer of the Prostate                | 15q13.3dup_CHRNA7 |  |
| MALE   | C61  | Cancer of the Prostate                | 15q13.3dup_CHRNA7 |  |
| MALE   | C61  | Cancer of the Prostate                | 15q13.3dup_CHRNA7 |  |
| MALE   | C61  | Cancer of the Prostate                | 15q13.3dup_CHRNA7 |  |
| MALE   | C61  | Cancer of the Prostate                | 15q13.3dup_CHRNA7 |  |
| FEMALE | C64  | Cancer of the Kidney                  | 15q13.3dup_CHRNA7 |  |
| MALE   | C64  | Cancer of the Kidney                  | 15q13.3dup_CHRNA7 |  |
| FEMALE | C64  | Cancer of the Kidney                  | 15q13.3dup_CHRNA7 |  |
| FEMALE | C64  | Cancer of the Kidney                  | 15q13.3dup_CHRNA7 |  |
| MALE   | C64  | Cancer of the Kidney                  | 15q13.3dup_CHRNA7 |  |
| MALE   | C719 | Cancer of the Brain                   | 15q13.3dup_CHRNA7 |  |
| MALE   | C831 | non-Hodgkin's lymphoma                | 15q13.3dup_CHRNA7 |  |
| FEMALE | C844 | Lymphoma                              | 15q13.3dup_CHRNA7 |  |
| MALE   | C845 | Lymphoma                              | 15q13.3dup_CHRNA7 |  |
| MALE   | C845 | Lymphoma                              | 15q13.3dup_CHRNA7 |  |
| FEMALE | C900 | Multiple myeloma                      | 15q13.3dup_CHRNA7 |  |
| FEMALE | D758 | Other specified diseases of blood     | 15q13.3dup_CHRNA7 |  |
| MALE   | G122 | Motor neuron disease                  | 15q13.3dup_CHRNA7 |  |
| FEMALE | G35  | Multiple sclerosis                    | 15q13.3dup_CHRNA7 |  |
| MALE   | I219 | Myocardial Infarction                 | 15q13.3dup_CHRNA7 |  |
| MALE   | I219 | Myocardial Infarction                 | 15q13.3dup_CHRNA7 |  |
| MALE   | I219 | Myocardial Infarction                 | 15q13.3dup_CHRNA7 |  |
| MALE   | I219 | Myocardial Infarction                 | 15q13.3dup_CHRNA7 |  |
| MALE   | I251 | Ischaemic heart disease               | 15q13.3dup_CHRNA7 |  |
| MALE   | I255 | Ischaemic cardiomyopathy              | 15q13.3dup_CHRNA7 |  |
| MALE   | I259 | Ischaemic heart disease               | 15q13.3dup_CHRNA7 |  |
| MALE   | I259 | Ischaemic heart disease               | 15q13.3dup_CHRNA7 |  |
| MALE   | I509 | Heart failure                         | 15q13.3dup_CHRNA7 |  |
| MALE   | I607 | Intracerebral haemorrhage             | 15q13.3dup_CHRNA7 |  |
| MALE   | I64  | Stroke                                | 15q13.3dup_CHRNA7 |  |
| MALE   | I64  | Stroke                                | 15q13.3dup_CHRNA7 |  |
| FEMALE | I828 | Other venous embolism and thrombosis  | 15q13.3dup_CHRNA7 |  |
| MALE   | J180 | Pneumonia                             | 15q13.3dup_CHRNA7 |  |
| FEMALE | J189 | Pneumonia                             | 15q13.3dup_CHRNA7 |  |
| MALE   | J449 | COPD                                  | 15q13.3dup_CHRNA7 |  |
| FEMALE | J841 | Other interstitial pulmonary diseases | 15q13.3dup_CHRNA7 |  |
| MALE   | J841 | Other interstitial pulmonary diseases | 15q13.3dup_CHRNA7 |  |
| MALE   | J984 | Other respiratory disorders           | 15q13.3dup_CHRNA7 |  |
| FEMALE | K551 | Vascular disorders of intestine       | 15q13.3dup_CHRNA7 |  |
| MALE   | K704 | Alcoholic liver disease               | 15q13.3dup_CHRNA7 |  |
| MALE   | K709 | Alcoholic liver disease               | 15q13.3dup_CHRNA7 |  |
| FEMALE | K859 | Other diseases of pancreas            | 15q13.3dup_CHRNA7 |  |

|        |      |                                         |                   |                   |
|--------|------|-----------------------------------------|-------------------|-------------------|
| MALE   | K859 | Other diseases of pancreas              | 15q13.3dup_CHRNA7 |                   |
| FEMALE | N319 | Neuromuscular dysfunction of bladder    | 15q13.3dup_CHRNA7 |                   |
| MALE   | V184 | Pedal cyclist accident                  | 15q13.3dup_CHRNA7 |                   |
| MALE   | W190 | Unspecified fall                        | 15q13.3dup_CHRNA7 |                   |
| MALE   | X450 | Alcohol poisoning, accidental           | 15q13.3dup_CHRNA7 |                   |
| MALE   | I517 | Cardiomegaly                            | 15q24_dup         |                   |
| MALE   | C169 | Cancer of the Stomach                   | 16p11.2del        |                   |
| FEMALE | C259 | Cancer of the Pancreas                  | 16p11.2del        | 2q13dup_NPHP1     |
| MALE   | C349 | Cancer of the lung                      | 16p11.2del        |                   |
| FEMALE | E668 | Obesity                                 | 16p11.2del        |                   |
| MALE   | G931 | Anoxic brain damage                     | 16p11.2del        | 15q13.3dup_CHRNA7 |
| MALE   | I110 | Hypertensive heart disease              | 16p11.2del        |                   |
| MALE   | I219 | Myocardial Infarction                   | 16p11.2del        |                   |
| MALE   | I509 | Heart failure                           | 16p11.2del        |                   |
| FEMALE | J181 | Pneumonia                               | 16p11.2del        |                   |
| MALE   | K709 | Alcoholic liver disease                 | 16p11.2del        |                   |
| MALE   | C719 | Cancer of the Brain                     | 16p11.2distal_del |                   |
| MALE   | I259 | Ischaemic heart disease                 | 16p11.2distal_del |                   |
| MALE   | J189 | Pneumonia                               | 16p11.2distal_del |                   |
| FEMALE | C349 | Cancer of the lung                      | 16p11.2distal_dup |                   |
| FEMALE | C349 | Cancer of the lung                      | 16p11.2distal_dup |                   |
| MALE   | C349 | Cancer of the lung                      | 16p11.2distal_dup |                   |
| FEMALE | C80  | Cancer, site not known                  | 16p11.2distal_dup |                   |
| MALE   | I251 | Ischaemic heart disease                 | 16p11.2distal_dup |                   |
| MALE   | J440 | COPD                                    | 16p11.2distal_dup |                   |
| FEMALE | C349 | Cancer of the lung                      | 16p11.2dup        |                   |
| MALE   | C719 | Cancer of the Brain                     | 16p11.2dup        |                   |
| FEMALE | C829 | non-Hodgkin's lymphoma                  | 16p11.2dup        |                   |
| MALE   | C20  | Cancer of the Rectum                    | 16p12.1del        |                   |
| MALE   | C221 | Cancer of the Liver                     | 16p12.1del        |                   |
| FEMALE | C509 | Cancer of the Breast                    | 16p12.1del        |                   |
| MALE   | C719 | Cancer of the Brain                     | 16p12.1del        |                   |
| MALE   | C900 | Multiple myeloma                        | 16p12.1del        |                   |
| MALE   | F019 | Vascular dementia                       | 16p12.1del        |                   |
| MALE   | G318 | degenerative diseases of nervous system | 16p12.1del        |                   |
| MALE   | I219 | Myocardial Infarction                   | 16p12.1del        |                   |
| FEMALE | I251 | Ischaemic heart disease                 | 16p12.1del        |                   |
| FEMALE | I251 | Ischaemic heart disease                 | 16p12.1del        |                   |
| MALE   | I269 | Pulmonary embolism                      | 16p12.1del        |                   |
| MALE   | I64  | Stroke                                  | 16p12.1del        |                   |
| MALE   | J180 | Pneumonia                               | 16p12.1del        |                   |
| MALE   | J841 | Other interstitial pulmonary diseases   | 16p12.1del        |                   |
| MALE   | X410 | Accidental poisoning                    | 16p12.1del        |                   |
| MALE   | C19  | Cancer of the rectosigmoid junction     | 16p12.1dup        |                   |
| FEMALE | C259 | Cancer of the Pancreas                  | 16p12.1dup        |                   |
| FEMALE | C56  | Cancer of the Ovary                     | 16p12.1dup        |                   |
| MALE   | C61  | Cancer of the Prostate                  | 16p12.1dup        |                   |
| MALE   | F102 | Alcohol Dependence                      | 16p12.1dup        |                   |
| FEMALE | I219 | Myocardial Infarction                   | 16p12.1dup        |                   |
| MALE   | I219 | Myocardial Infarction                   | 16p12.1dup        |                   |
| MALE   | W190 | Unspecified fall                        | 16p12.1dup        |                   |
| MALE   | C159 | Cancer of the Oesophagus                | 16p13.11.dup      |                   |
| MALE   | C159 | Cancer of the Oesophagus                | 16p13.11.dup      |                   |
| MALE   | C180 | Cancer of the Colon                     | 16p13.11.dup      |                   |
| MALE   | C189 | Cancer of the Colon                     | 16p13.11.dup      |                   |
| MALE   | C259 | Cancer of the Pancreas                  | 16p13.11.dup      |                   |
| MALE   | C329 | Cancer of the Larynx                    | 16p13.11.dup      |                   |
| MALE   | C349 | Cancer of the lung                      | 16p13.11.dup      |                   |
| FEMALE | C349 | Cancer of the lung                      | 16p13.11.dup      |                   |
| FEMALE | C509 | Cancer of the Breast                    | 16p13.11.dup      |                   |
| FEMALE | C541 | Cancer of the Endometrium               | 16p13.11.dup      |                   |
| FEMALE | C56  | Cancer of the Ovary                     | 16p13.11.dup      |                   |
| FEMALE | C56  | Cancer of the Ovary                     | 16p13.11.dup      |                   |
| MALE   | C61  | Cancer of the Prostate                  | 16p13.11.dup      |                   |
| MALE   | C61  | Cancer of the Prostate                  | 16p13.11.dup      |                   |
| MALE   | C679 | Cancer of the Bladder                   | 16p13.11.dup      |                   |
| FEMALE | C710 | Cancer of the Brain                     | 16p13.11.dup      |                   |
| MALE   | C719 | Cancer of the Brain                     | 16p13.11.dup      |                   |
| FEMALE | C719 | Cancer of the Brain                     | 16p13.11.dup      |                   |
| MALE   | C859 | Non-Hodgkin's lymphoma                  | 16p13.11.dup      |                   |
| FEMALE | D432 | Cancer of the Brain                     | 16p13.11.dup      |                   |
| FEMALE | E785 | Hyperlipidaemia                         | 16p13.11.dup      |                   |
| MALE   | G20  | Parkinson's disease                     | 16p13.11.dup      |                   |
| FEMALE | G318 | degenerative diseases of nervous system | 16p13.11.dup      |                   |
| MALE   | I119 | Hypertensive heart disease              | 16p13.11.dup      |                   |

|        |      |                                       |                   |  |
|--------|------|---------------------------------------|-------------------|--|
| MALE   | I219 | Myocardial Infarction                 | 16p13.11.dup      |  |
| MALE   | I219 | Myocardial Infarction                 | 16p13.11.dup      |  |
| MALE   | I251 | Ischaemic heart disease               | 16p13.11.dup      |  |
| FEMALE | I48  | Atrial fibrillation                   | 16p13.11.dup      |  |
| FEMALE | I609 | Intracerebral haemorrhage             | 16p13.11.dup      |  |
| FEMALE | J189 | Pneumonia                             | 16p13.11.dup      |  |
| MALE   | J22  | Pneumonia                             | 16p13.11.dup      |  |
| MALE   | J449 | COPD                                  | 16p13.11.dup      |  |
| MALE   | J449 | COPD                                  | 16p13.11.dup      |  |
| MALE   | J690 | Pneumonitis due to food and vomit     | 16p13.11.dup      |  |
| MALE   | K550 | Vascular disorders of intestine       | 16p13.11.dup      |  |
| FEMALE | K631 | Perforation of intestine              | 16p13.11.dup      |  |
| FEMALE | Q446 | Cystic disease of liver               | 16p13.11.dup      |  |
| MALE   | W15  | Fall from cliff                       | 16p13.11.dup      |  |
| MALE   | X640 | Suicide                               | 16p13.11.dup      |  |
| FEMALE | C189 | Cancer of the Colon                   | 16p13.11del       |  |
| MALE   | C260 | Cancer of other digestive organs      | 16p13.11del       |  |
| MALE   | C260 | Cancer of other digestive organs      | 16p13.11del       |  |
| MALE   | K922 | Gastro-intestinal haemorrhage         | 16p13.11del       |  |
| MALE   | G35  | Multiple sclerosis                    | 17p12del_HNPP     |  |
| MALE   | X718 | Suicide                               | 17p12del_HNPP     |  |
| MALE   | C349 | Cancer of the lung                    | 17p12dup_CMT1A    |  |
| MALE   | J440 | COPD                                  | 17p12dup_CMT1A    |  |
| FEMALE | J449 | COPD                                  | 17p12dup_CMT1A    |  |
| MALE   | C911 | Chronic lymphocytic leukaemia         | 17q12del          |  |
| MALE   | C349 | Cancer of the lung                    | 17q12dup          |  |
| MALE   | C349 | Cancer of the lung                    | 17q12dup          |  |
| MALE   | I219 | Myocardial Infarction                 | 17q12dup          |  |
| FEMALE | I251 | Ischaemic heart disease               | 17q12dup          |  |
| FEMALE | J151 | Pneumonia                             | 17q12dup          |  |
| MALE   | J189 | Pneumonia                             | 17q12dup          |  |
| FEMALE | X700 | Suicide                               | 17q12dup          |  |
| MALE   | C20  | Cancer of the Rectum                  | 1q21.1del         |  |
| FEMALE | G122 | Motor neuron disease                  | 1q21.1del         |  |
| FEMALE | I420 | Cardiomyopathy                        | 1q21.1del         |  |
| FEMALE | I609 | Intracerebral haemorrhage             | 1q21.1del         |  |
| MALE   | J441 | COPD                                  | 1q21.1del         |  |
| FEMALE | J441 | COPD                                  | 1q21.1del         |  |
| MALE   | K254 | Gastric ulcer                         | 1q21.1del         |  |
| FEMALE | C187 | Cancer of the Colon                   | 1q21.1dup         |  |
| FEMALE | C349 | Cancer of the lung                    | 1q21.1dup         |  |
| MALE   | C349 | Cancer of the lung                    | 1q21.1dup         |  |
| FEMALE | C56  | Cancer of the Ovary                   | 1q21.1dup         |  |
| MALE   | C719 | Cancer of the Brain                   | 1q21.1dup         |  |
| MALE   | C920 | Acute myeloid leukaemia               | 1q21.1dup         |  |
| MALE   | I259 | Ischaemic heart disease               | 1q21.1dup         |  |
| FEMALE | I639 | Cerebral infarction                   | 1q21.1dup         |  |
| MALE   | J841 | Other interstitial pulmonary diseases | 1q21.1dup         |  |
| FEMALE | G409 | Epilepsy                              | 22q11.2del        |  |
| MALE   | I710 | Aortic aneurysm                       | 22q11.2distal_del |  |
| MALE   | C159 | Cancer of the Oesophagus              | 22q11.2dup        |  |
| FEMALE | C259 | Cancer of the Pancreas                | 22q11.2dup        |  |
| FEMALE | C509 | Cancer of the Breast                  | 22q11.2dup        |  |
| FEMALE | C509 | Cancer of the Breast                  | 22q11.2dup        |  |
| MALE   | C61  | Cancer of the Prostate                | 22q11.2dup        |  |
| MALE   | C859 | Non-Hodgkin's lymphoma                | 22q11.2dup        |  |
| MALE   | I251 | Ischaemic heart disease               | 22q11.2dup        |  |
| FEMALE | I359 | Aortic valve disorder                 | 22q11.2dup        |  |
| MALE   | J690 | Pneumonitis due to food and vomit     | 22q11.2dup        |  |
| MALE   | J841 | Other interstitial pulmonary diseases | 22q11.2dup        |  |
| FEMALE | K559 | Vascular disorders of intestine       | 22q11.2dup        |  |
| MALE   | K746 | Cirrhosis of liver                    | 22q11.2dup        |  |
| MALE   | K802 | Cholelithiasis                        | 22q11.2dup        |  |
| MALE   | R99  | Unspecified                           | 22q11.2dup        |  |
| FEMALE | C56  | Cancer of the Ovary                   | 2q11.2dup         |  |
| FEMALE | C859 | Non-Hodgkin's lymphoma                | 2q13del           |  |
| MALE   | C139 | Cancer of the Hypopharynx             | 2q13del_NPHP1     |  |
| MALE   | C159 | Cancer of the Oesophagus              | 2q13del_NPHP1     |  |
| MALE   | C159 | Cancer of the Oesophagus              | 2q13del_NPHP1     |  |
| MALE   | C160 | Cancer of the Stomach                 | 2q13del_NPHP1     |  |
| MALE   | C187 | Cancer of the Colon                   | 2q13del_NPHP1     |  |
| MALE   | C189 | Cancer of the Colon                   | 2q13del_NPHP1     |  |
| MALE   | C189 | Cancer of the Colon                   | 2q13del_NPHP1     |  |
| FEMALE | C19  | Cancer of the rectosigmoid junction   | 2q13del_NPHP1     |  |
| FEMALE | C19  | Cancer of the rectosigmoid junction   | 2q13del_NPHP1     |  |

|        |      |                                                    |               |               |
|--------|------|----------------------------------------------------|---------------|---------------|
| MALE   | C220 | Cancer of the Liver                                | 2q13del_NPHP1 |               |
| FEMALE | C221 | Cancer of the Liver                                | 2q13del_NPHP1 |               |
| MALE   | C259 | Cancer of the Pancreas                             | 2q13del_NPHP1 | 15q11.2dup    |
| MALE   | C259 | Cancer of the Pancreas                             | 2q13del_NPHP1 |               |
| MALE   | C329 | Cancer of the Larynx                               | 2q13del_NPHP1 |               |
| MALE   | C349 | Cancer of the lung                                 | 2q13del_NPHP1 | 15q11.2dup    |
| MALE   | C349 | Cancer of the lung                                 | 2q13del_NPHP1 |               |
| MALE   | C349 | Cancer of the lung                                 | 2q13del_NPHP1 |               |
| MALE   | C349 | Cancer of the lung                                 | 2q13del_NPHP1 |               |
| FEMALE | C349 | Cancer of the lung                                 | 2q13del_NPHP1 |               |
| FEMALE | C349 | Cancer of the lung                                 | 2q13del_NPHP1 |               |
| MALE   | C349 | Cancer of the lung                                 | 2q13del_NPHP1 |               |
| MALE   | C459 | Mesothelioma                                       | 2q13del_NPHP1 |               |
| MALE   | C499 | Cancer of connective and soft tissue               | 2q13del_NPHP1 |               |
| FEMALE | C509 | Cancer of the Breast                               | 2q13del_NPHP1 |               |
| FEMALE | C509 | Cancer of the Breast                               | 2q13del_NPHP1 |               |
| FEMALE | C509 | Cancer of the Breast                               | 2q13del_NPHP1 |               |
| FEMALE | C56  | Cancer of the Ovary                                | 2q13del_NPHP1 |               |
| FEMALE | C56  | Cancer of the Ovary                                | 2q13del_NPHP1 |               |
| MALE   | C61  | Cancer of the Prostate                             | 2q13del_NPHP1 |               |
| MALE   | C61  | Cancer of the Prostate                             | 2q13del_NPHP1 |               |
| FEMALE | C64  | Cancer of the Kidney                               | 2q13del_NPHP1 |               |
| MALE   | C719 | Cancer of the Brain                                | 2q13del_NPHP1 |               |
| FEMALE | C800 | Cancer, site not known                             | 2q13del_NPHP1 |               |
| FEMALE | C851 | Lymphoma                                           | 2q13del_NPHP1 |               |
| FEMALE | C900 | Multiple myeloma                                   | 2q13del_NPHP1 |               |
| MALE   | C900 | Multiple myeloma                                   | 2q13del_NPHP1 |               |
| FEMALE | D471 | Chronic myeloproliferative disease                 | 2q13del_NPHP1 |               |
| MALE   | E854 | Amyloidosis                                        | 2q13del_NPHP1 |               |
| MALE   | F03  | Dementia                                           | 2q13del_NPHP1 |               |
| MALE   | G122 | Motor neuron disease                               | 2q13del_NPHP1 |               |
| FEMALE | G122 | Motor neuron disease                               | 2q13del_NPHP1 |               |
| MALE   | G231 | Other degenerative diseases of basal ganglia       | 2q13del_NPHP1 |               |
| FEMALE | I214 | Myocardial Infarction                              | 2q13del_NPHP1 |               |
| MALE   | I219 | Myocardial Infarction                              | 2q13del_NPHP1 |               |
| MALE   | I219 | Myocardial Infarction                              | 2q13del_NPHP1 |               |
| FEMALE | I251 | Ischaemic heart disease                            | 2q13del_NPHP1 |               |
| MALE   | I259 | Ischaemic heart disease                            | 2q13del_NPHP1 |               |
| MALE   | I259 | Ischaemic heart disease                            | 2q13del_NPHP1 |               |
| FEMALE | I604 | Intracerebral haemorrhage                          | 2q13del_NPHP1 |               |
| MALE   | I64  | Stroke                                             | 2q13del_NPHP1 |               |
| FEMALE | I64  | Stroke                                             | 2q13del_NPHP1 |               |
| FEMALE | I802 | Phlebitis and thrombophlebitis                     | 2q13del_NPHP1 |               |
| MALE   | J440 | COPD                                               | 2q13del_NPHP1 |               |
| FEMALE | J849 | Other interstitial pulmonary diseases              | 2q13del_NPHP1 |               |
| MALE   | J849 | Other interstitial pulmonary diseases              | 2q13del_NPHP1 |               |
| MALE   | K709 | Alcoholic liver disease                            | 2q13del_NPHP1 |               |
| MALE   | M069 | Rheumatoid arthritis                               | 2q13del_NPHP1 |               |
| FEMALE | W19  | Unspecified fall                                   | 2q13del_NPHP1 |               |
| MALE   | X000 | Exposure to smoke                                  | 2q13del_NPHP1 |               |
| FEMALE | X590 | Exposure to unspecified factor                     | 2q13del_NPHP1 |               |
| MALE   | Y30  | Falling, jumping or pushed from a high place, unde | 2q13del_NPHP1 |               |
| MALE   | J849 | Other interstitial pulmonary diseases              | 2q13dup       | 2q13del_NPHP1 |
| MALE   | K922 | Gastro-intestinal haemorrhage                      | 2q13dup       |               |
| MALE   | C119 | Cancer of the Nasopharynx                          | 2q13dup_NPHP1 |               |
| MALE   | C159 | Cancer of the Oesophagus                           | 2q13dup_NPHP1 |               |
| MALE   | C180 | Cancer of the Colon                                | 2q13dup_NPHP1 |               |
| MALE   | C189 | Cancer of the Colon                                | 2q13dup_NPHP1 |               |
| MALE   | C19  | Cancer of the rectosigmoid junction                | 2q13dup_NPHP1 |               |
| FEMALE | C20  | Cancer of the Rectum                               | 2q13dup_NPHP1 |               |
| MALE   | C220 | Cancer of the Liver                                | 2q13dup_NPHP1 |               |
| MALE   | C259 | Cancer of the Pancreas                             | 2q13dup_NPHP1 |               |
| MALE   | C260 | Cancer of other digestive organs                   | 2q13dup_NPHP1 |               |
| MALE   | C349 | Cancer of the lung                                 | 2q13dup_NPHP1 |               |
| MALE   | C349 | Cancer of the lung                                 | 2q13dup_NPHP1 |               |
| MALE   | C349 | Cancer of the lung                                 | 2q13dup_NPHP1 |               |
| MALE   | C439 | Cancer of the skin                                 | 2q13dup_NPHP1 |               |
| MALE   | C61  | Cancer of the Prostate                             | 2q13dup_NPHP1 |               |
| MALE   | C61  | Cancer of the Prostate                             | 2q13dup_NPHP1 |               |
| FEMALE | C80  | Cancer, site not known                             | 2q13dup_NPHP1 |               |
| MALE   | C800 | Cancer, site not known                             | 2q13dup_NPHP1 |               |
| MALE   | C809 | Cancer, site not known                             | 2q13dup_NPHP1 |               |
| FEMALE | C920 | Acute myeloid leukaemia                            | 2q13dup_NPHP1 |               |
| MALE   | C920 | Acute myeloid leukaemia                            | 2q13dup_NPHP1 |               |
| MALE   | C97  | Cancer                                             | 2q13dup_NPHP1 |               |

|        |      |                                      |                   |                   |
|--------|------|--------------------------------------|-------------------|-------------------|
| MALE   | F019 | Vascular dementia                    | 2q13dup_NPHP1     |                   |
| MALE   | G122 | Motor neuron disease                 | 2q13dup_NPHP1     |                   |
| MALE   | G122 | Motor neuron disease                 | 2q13dup_NPHP1     |                   |
| FEMALE | G20  | Parkinson's disease                  | 2q13dup_NPHP1     |                   |
| MALE   | G20  | Parkinson's disease                  | 2q13dup_NPHP1     |                   |
| MALE   | I119 | Hypertensive heart disease           | 2q13dup_NPHP1     |                   |
| FEMALE | I219 | Myocardial Infarction                | 2q13dup_NPHP1     |                   |
| MALE   | I251 | Ischaemic heart disease              | 2q13dup_NPHP1     |                   |
| MALE   | I251 | Ischaemic heart disease              | 2q13dup_NPHP1     |                   |
| FEMALE | I269 | Pulmonary embolism                   | 2q13dup_NPHP1     | 15q13.3dup_CHRNA7 |
| FEMALE | I269 | Pulmonary embolism                   | 2q13dup_NPHP1     |                   |
| MALE   | I269 | Pulmonary embolism                   | 2q13dup_NPHP1     |                   |
| MALE   | I38  | Endocarditis                         | 2q13dup_NPHP1     |                   |
| MALE   | I429 | Cardiomyopathy                       | 2q13dup_NPHP1     |                   |
| FEMALE | I607 | Intracerebral haemorrhage            | 2q13dup_NPHP1     |                   |
| FEMALE | I679 | Other cerebrovascular disease        | 2q13dup_NPHP1     |                   |
| MALE   | I839 | Other venous embolism and thrombosis | 2q13dup_NPHP1     |                   |
| FEMALE | J180 | Pneumonia                            | 2q13dup_NPHP1     |                   |
| MALE   | J180 | Pneumonia                            | 2q13dup_NPHP1     |                   |
| FEMALE | J441 | COPD                                 | 2q13dup_NPHP1     |                   |
| MALE   | J47  | Bronchiectasis                       | 2q13dup_NPHP1     |                   |
| FEMALE | K704 | Alcoholic liver disease              | 2q13dup_NPHP1     |                   |
| MALE   | K709 | Alcoholic liver disease              | 2q13dup_NPHP1     |                   |
| FEMALE | K709 | Alcoholic liver disease              | 2q13dup_NPHP1     |                   |
| MALE   | V892 | Motor accident                       | 2q13dup_NPHP1     |                   |
| MALE   | I259 | Ischaemic heart disease              | 2q21.1del         |                   |
| MALE   | C029 | Cancer of the tongue                 | 2q21.1dup         |                   |
| FEMALE | C259 | Cancer of the Pancreas               | 2q21.1dup         |                   |
| MALE   | I219 | Myocardial Infarction                | 2q21.1dup         |                   |
| MALE   | K859 | Other diseases of pancreas           | 2q21.1dup         |                   |
| MALE   | R99  | Unspecified                          | 2q21.1dup         |                   |
| FEMALE | C509 | Cancer of the Breast                 | 7q11.23dup_distal |                   |
| FEMALE | I619 | Intracerebral haemorrhage            | 7q11.23dup_distal |                   |
| MALE   | J189 | Pneumonia                            | 7q11.23dup_distal |                   |
| FEMALE | C180 | Cancer of the Colon                  | NRXN1del          |                   |
| FEMALE | C189 | Cancer of the Colon                  | NRXN1del          |                   |
| MALE   | C439 | Cancer of the skin                   | NRXN1del          |                   |
| FEMALE | I609 | Intracerebral haemorrhage            | NRXN1del          |                   |
| MALE   | K266 | Duodenal ulcer                       | NRXN1del          |                   |
| MALE   | C509 | Cancer of the Breast                 | Potocki_Lupski    |                   |
| MALE   | I219 | Myocardial Infarction                | PWS_dup           |                   |
| FEMALE | C509 | Cancer of the Breast                 | TAR_del           |                   |
| FEMALE | C56  | Cancer of the Ovary                  | TAR_del           |                   |
| MALE   | J449 | COPD                                 | TAR_del           |                   |
| MALE   | C159 | Cancer of the Oesophagus             | TAR_dup           |                   |
| MALE   | C169 | Cancer of the Stomach                | TAR_dup           |                   |
| FEMALE | C169 | Cancer of the Stomach                | TAR_dup           |                   |
| FEMALE | C541 | Cancer of the Endometrium            | TAR_dup           |                   |
| FEMALE | C56  | Cancer of the Ovary                  | TAR_dup           |                   |
| FEMALE | C851 | Lymphoma                             | TAR_dup           |                   |
| MALE   | C859 | Non-Hodgkin's lymphoma               | TAR_dup           |                   |
| MALE   | C920 | Acute myeloid leukaemia              | TAR_dup           | 1q21.1dup         |
| MALE   | I711 | Aortic aneurysm                      | TAR_dup           |                   |
| MALE   | J449 | COPD                                 | TAR_dup           | 2q13dup_NPHP1     |
| MALE   | J449 | COPD                                 | TAR_dup           |                   |
